# Supplementary material
Source: PubMed Central journal article supplement (PMC7498988)
Supplement: 41551_2020_611_MOESM1_ESM.pdf [file 41551_2020_611_MOESM1_ESM.pdf]

**Supplementary information**

---

**Ultrasensitive high-resolution profiling of early seroconversion in patients with COVID-19**

---

In the format provided by the authors and unedited

## **Table of contents**

Supplementary Figure 1: RBD sequence and purification characterization

Supplementary Figure 2: Spike protein sequence and purification characterization

Supplementary Figure 3: Bead coupling validation

Supplementary Tables 1-3: Detector antibody screening

Supplementary Figure 4: Dilution linearity of immunoglobulin assays

Supplementary Table 4: Spike and recovery of the IgG assay

Supplementary Table 5: Clinical characteristics of the discovery cohort

Supplementary Figure 5: Discovery cohort results

Supplementary Figure 6: CV values – validation cohort

Supplementary Table 6: U-test results – validation cohort

Supplementary Table 7: Five-fold cross validation results for early stage cases

Supplementary Table 8: Five-fold cross validation results for late stage cases

Supplementary Table 9: Classification accuracy

Supplementary Figure 7: Cross reactivity of the control samples with common human coronaviruses

Codes caption

## Figure S1: RBD sequence and purification characterization

RBD represents amino acid residues 319-529 from full-length SARS-CoV-2 spike glycoprotein (GenBank Accession no. MN975262.1)

>SARS CoV2 RBD pVRC

```
GCTAGCCGCGTACAGCCACTGAAAGCATTGTTTCGCTTTCCCAACATAACAACTTGTGCCCTTTGGA
GAGGTCTTCAATGCTACGAGATTTGCCCTCCGTCTACGCTTGAATCGGAAACGGATTAGCAACTGCGTG
GCTGACTATTCAGTGCTGTACAACCTCTGCTTCTTTCTCAACATTCAAGTGTTACGGGGTCTCTCCAATA
AACTGAATGATCTTTGTTTTACGAACGTATACGCAGATTCTTTCGTAATACGAGGCGATGAGGTGAGGCA
GATCGCCCCCGGGCAAACCTGGTAAAATAGCTGACTACAATTACAAGTTGCCGGACGACTTCACTGGGT
GTGTTATTGCCTGGAATTCTAATAACTTGGATTCCAAAGTAGGAGGCAATTACAACCTATCTTTACAGGCT
TTTCCGGAAATCTAACTTGAAACCGTTTCAAAGGGACATCTCAACGGAGATCTACCAGGCAGGGTCCAC
GCCTTGCAATGGGGTAGAGGGTTTTAATTGTTATTTCCCTTGCAGTCATATGGTTTCCAACCGACAAT
GGTGTGGGTACCAGCCGTACCGGGTCGTGGTATTGTCTTCGAGTTGCTCCATGCGCCAGCGACTGT
ATGTGGGCCCAAAAAGGGCGCCGGCTCCAGCCTTGAGGTCCTTCCAAGGACCCGGTTCAGGCTCCA
GCCACCATCACCATCATCATCACCACGGGGTTCTGGCTCCAGCATGGATGAGAAAACCACCGGCTGG
AGAGGCGGTCACGTCGTAGAGGGTTGGCTGGCGAACTCGAACAACTTCGAGCGAGATTGGAACACC
ATCCCAGGGTCAGCGGGAGCCTTGATGAGCGGCCGCT
```

NheI

KasI

NotI

>translation SARS CoV2 RBD pVRC

```
RVQPTESIVRFPNITNLCPFGEVFNATRFASVYAWNRKRISNCVADYSVLYNSASFSTFKCYGVSPTKLNLDL
FTNVYADSFVIRGDEVRQIAPGQTGKIADYNYKLPDDFTGCVIAWNSNNLDSKVGNNYLYRFRKSNLKP
FERDISTEIYQAGSTPCNGVEGFNCYFPLQSYGFQPTNGVGYQPYRVVLSFELLHAPATVCGPKKGAGSSL
EVLVFGPGSGSSHHHHHHHGGSGSSMDEKTTGWRGGHVVVEGLAGELEQLRARLEHHPQGQREP
```

HRV 3C Cleavage Site

8xHis Tag

Streptavidin-Binding Peptide (SBP) Tag

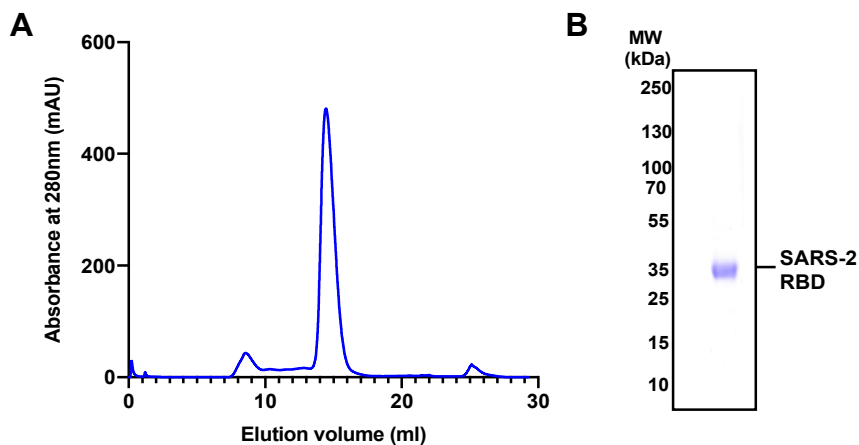

Supplementary Figure 1. Purification and biochemical characterization of SARS-CoV-2 (SARS-2) RBD. A) Representative size exclusion chromatography profile of SARS-2 RBD eluting at approximately 14.5 ml. B) SDS-PAGE analysis (reducing conditions) of the purified SARS-2 RBD.

## Figure S2: Spike protein sequence and purification validation

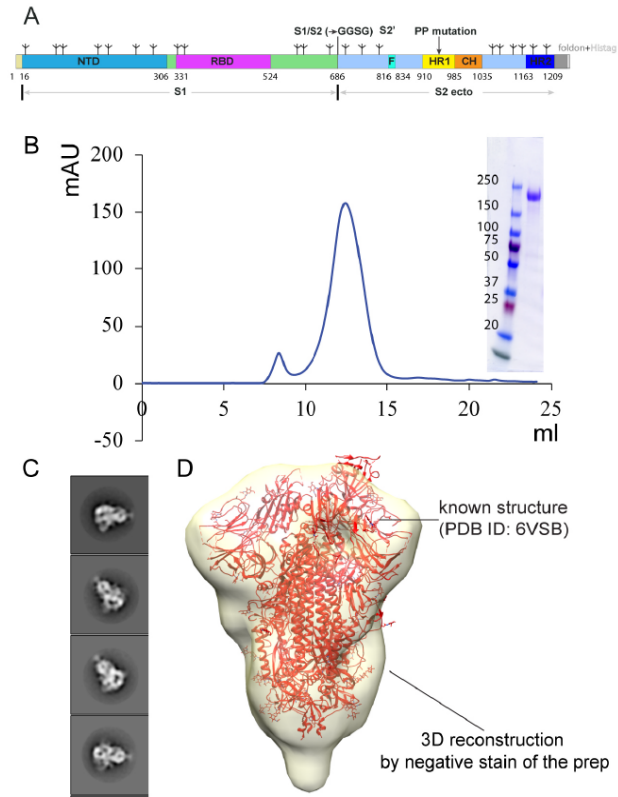

Supplementary Figure 2. Production of a stabilized S ectodomain trimer in the prefusion conformation. (A) Schematic representation of the construct design. Various segments include: NTD, N-terminal domain; RBD, receptor-binding domain; S1/S2, S1/S2 cleavage site; S2', S2' cleavage site; F, fusion peptide; HR1, heptad repeat 1; PP mutation, two proline residues introduced to stabilize the prefusion conformation; CH, central helix region; HR2, heptad repeat 2; foldon trimerization tag and a His tag; and tree-like symbols for glycans. (B) The purified S ectodomain trimer was resolved by gel-filtration chromatography. Inset, fractions of the peak were analyzed by Coomassie stained SDS-PAGE. (C) Negative stain EM of the S trimer showing representative 2D class averages, box size 220 Å. (D) 3D reconstruction showing the defined shape of S trimer, superimposed with the atomic model of S trimer (PDB: 6VSB).

## Figure S3: Bead coupling validation

In order to confirm that coupling was successful, we tested the beads in two ways. First, we tested the three proteins which had His tags. To that end we loaded all four beads and used a biotinylated anti-his tag antibody for detection in decreasing quantities. As expected, the three His tagged proteins gave high signal while the RBD protein, which had its His tag removed, gave low signal. Next, to ensure the RBD protein had also been conjugated properly to the bead, we introduced a recombinant human anti-RBD domain antibody (CR3022) and used an anti-human IgG biotinylated detector to complete the immunocomplex. Since the Spike protein and S1 also contain the RBD domain we expected that the antibody would bind to all three, but that it would not bind to the nucleocapsid protein.

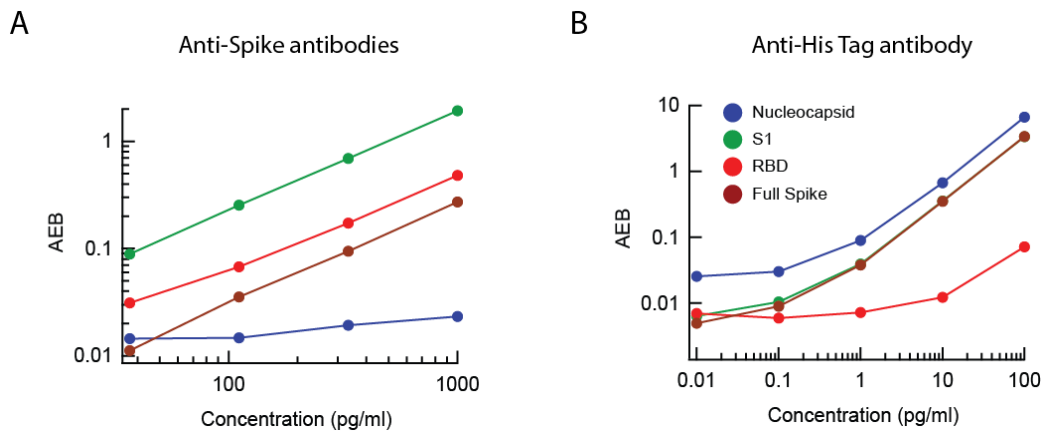

### Supplementary Tables 1-3: Detector antibody screening

In order to identify the highest affinity anti-IgM and anti-IgA antibodies, we screened candidates using a sandwich Simoa immunoassay for detection of each isotype. In this screening process commercially available human-plasma-derived immunoglobulins (IgM Sigma-Aldrich I8260 and IgA Sigma-Aldrich I4036) were used as our protein standards in a sandwich Simoa assay. We then cross-tested each anti-IgM or anti-IgA antibody as a capture antibody against all other candidate IgM or IgA antibodies as detectors in order to establish high binding affinity on the Simoa platform. This was done separately for IgM and IgA. Tight binders were selected for further analysis. Below, are tables indicating signal to noise ratios (SNR) for each antibody pair.

Supplementary Table 1: IgA detector cross-testing

| IgA detector | 411502 | MAB4787 | AB214003 | AB224184 | A80109B | AB128739 | AB128731 |
|--------------|--------|---------|----------|----------|---------|----------|----------|
| 411502       |        | 10.59   | 41.94    | 48.74    | 115.36  | 14.79    | 1.25     |
| MAB4787      | 0.16   |         | 121.78   | 4.81     | 25.7    | 64.51    | 4.13     |
| AB214003     | 61.49  | 13.28   |          | 28.72    | 58.25   | 3.88     | 1.08     |

Supplementary Table 2: IgM detector cross-testing

| IgM detector | MII401 | MII402 | MAB9435 | MAB94351 | 314502 | A80-100B |
|--------------|--------|--------|---------|----------|--------|----------|
| MII401       |        | 3.62   | 1.59    | 1.29     | 41.60  | NaN      |
| MII402       | 33.01  |        | 1.14    | 1.30     | 23.48  | NaN      |
| MAB9435      | 1.04   | 1.00   |         | 1.10     | 0.19   | 0.89     |
| MAB94351     | 0.94   | 1.04   | 0.32    |          | NaN    | 0.35     |
| 314502       | 15.75  | 2.72   | 0.80    | 0.91     |        | 5.49     |

Since the antibodies to be screened for IgG detection were mouse, rabbit and goat IgGs, we could not screen them using the above method because of species cross-reactivity. Instead, we screened anti-IgG detector antibodies using a mixture of three commercially available recombinant human IgGs to S1 (Creative Biolabs CR3022, CBFYR-0119, CBFYR-0120) and the four viral epitope coated beads (spike, S1, RBD and nucleocapsid). As expected, the beads that show a high SNR are those that have an RBD domain (RBD, S1, Spike) but not the nucleocapsid. A80-148B was chosen for further analysis due to its high SNR.

Supplementary Table 3:

| IgG Detector          | A80-148B      | 410701 | 409302 |
|-----------------------|---------------|--------|--------|
| Nucleocapsid bead SNR | <b>2.68</b>   | 1.34   | 1.44   |
| S1 bead SNR           | <b>216.29</b> | 143.28 | 10.11  |
| RBD bead SNR          | <b>66.31</b>  | 15.77  | 24.42  |
| Spike bead SNR        | <b>651.27</b> | 4.69   | 34.34  |

**Supplementary Figure 4: Dilution linearity for all immunoglobulin assays**

Four COVID 19+ patient samples were diluted three times (250x, 1000x & 4000x). Below we demonstrate that in all 12 assays the AEB values (signal) diluted linearly for all patients.

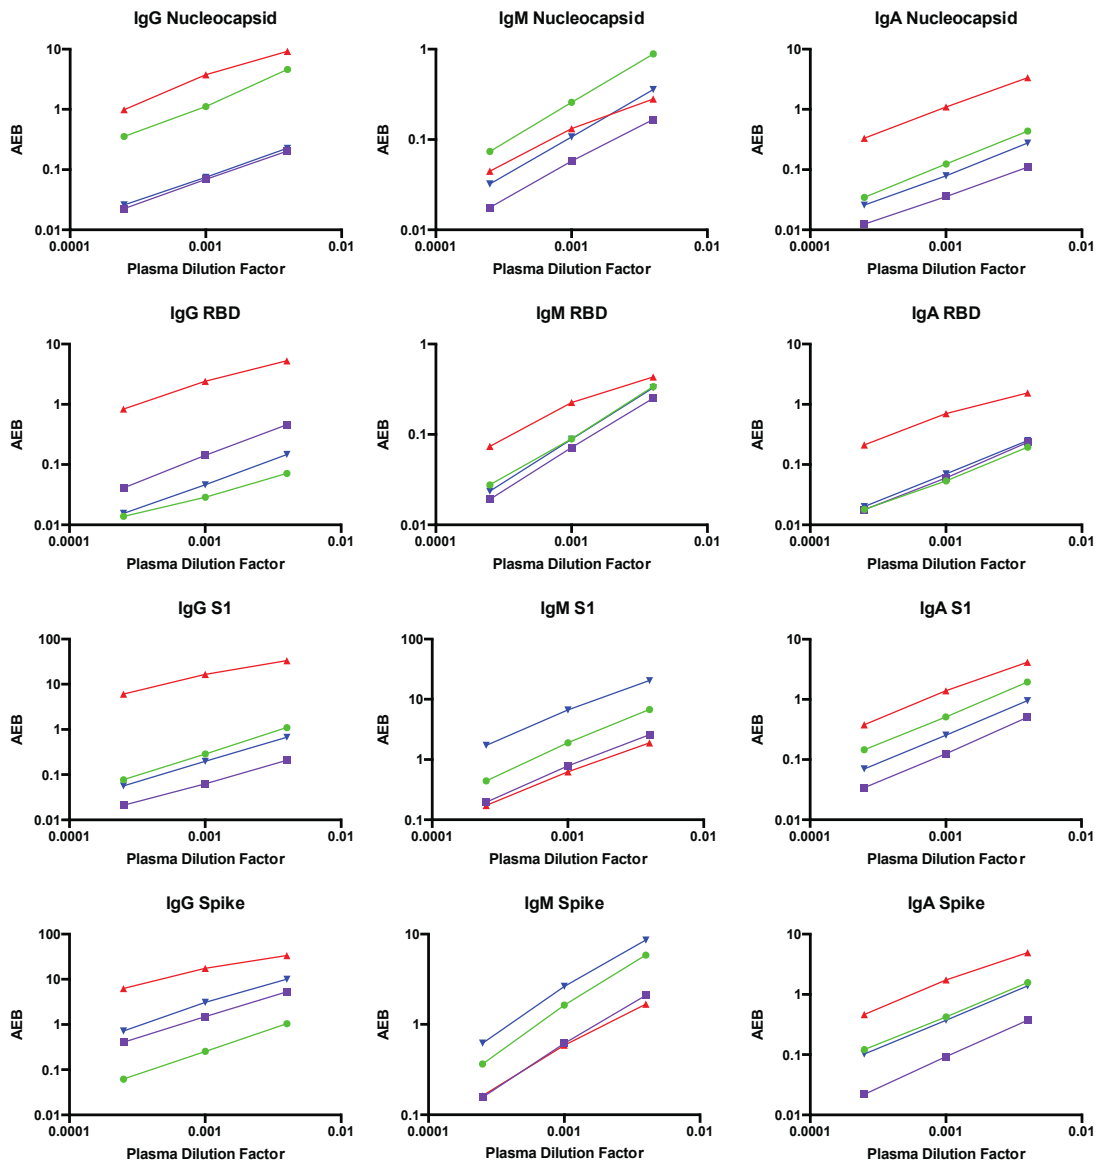

#### **Supplementary Table 4: Spike and recovery for IgG assay**

In order to establish that the assays were accurate and quantitative, we created a calibration curve using three recombinant human IgG antibodies to S1 that we serially diluted (Creative Biolabs CR3022, CBFYR-0119, CBFYR-0120). We then spiked these antibodies into pre-pandemic pooled human plasma (BIOIVT) in order to show good recovery at relevant dilution factors. We did not have recombinant IgM or IgA human antibodies to SARS-CoV-2, so this validation could only be done for IgG.

| <b>Spiked concentration (pg/ml)</b> | <b>Dilution factor</b> | <b>AEB</b> | <b>Measured concentration (pg/ml)</b> | <b>% Recovery</b> |
|-------------------------------------|------------------------|------------|---------------------------------------|-------------------|
| 250                                 | 250                    | 0.128359   | 230.5                                 | 92.2              |
| 250                                 | 500                    | 0.138653   | 251.1                                 | 100.4             |
| 250                                 | 1000                   | 0.142077   | 258.1                                 | 103.2             |
| 1000                                | 250                    | 0.425218   | 892.7                                 | 89.3              |
| 1000                                | 500                    | 0.423456   | 888.1                                 | 88.8              |
| 1000                                | 1000                   | 0.408272   | 849.8                                 | 85.0              |

#### **Supplementary Table 5: Clinical characteristics of the discovery cohort**

| <b>Patient characteristics</b>                     | <b>NP PCR Positive (n=21)</b> | <b>NP PCR Negative (n=19)</b> | <b>Pre-pandemic control (n=20)</b> |
|----------------------------------------------------|-------------------------------|-------------------------------|------------------------------------|
| Age (25 <sup>th</sup> , 75 <sup>th</sup> quartile) | 58 (45, 72)                   | 61 (41, 75)                   | 55 (33, 59)                        |
| Male (%)                                           | 20 (90.9)                     | 11 (57.9)                     | 8 (40)                             |
| <b>Symptoms at presentation (%)</b>                |                               |                               |                                    |
| Fever                                              | 16 (72.7)                     | 4 (21)                        | NA                                 |
| Cough                                              | 17 (77.2)                     | 5 (26.3)                      | NA                                 |
| SOB                                                | 15 (68.2)                     | 5 (26.3)                      | NA                                 |
| Sore throat                                        | 0 (0)                         | 1 (5.3)                       | NA                                 |
| Myalgia                                            | 4 (18.2)                      | 2 (10.5)                      | NA                                 |
| <b>Risk Factors</b>                                |                               |                               |                                    |
| Diabetes                                           | 4 (18.2)                      | NA                            | NA                                 |
| Immunosuppression                                  | 2 (9.1)                       | NA                            | NA                                 |
| Lung disease                                       | 2 (9.1)                       | NA                            | NA                                 |
| Heart disease                                      | 7 (31.8)                      | NA                            | NA                                 |
| <b>Clinical Outcome (%)</b>                        |                               |                               |                                    |
| Required Ventilation                               | 12 (54.5)                     | NA                            | NA                                 |
| Discharged from hospital                           | 11 (0.5)                      | NA                            | NA                                 |
| Still admitted                                     | 9 (45)                        | NA                            | NA                                 |
| Death                                              | 2 (10)                        | NA                            | NA                                 |
| CoV related death                                  | 2 (10)                        | NA                            | NA                                 |

## Supplementary Figure 5: Discovery cohort results

In order to establish whether our assay detects seroconversion in SARS-CoV-2 infected patients, we initially tested 81 plasma samples from Massachusetts General Hospital (MGH) in Boston, MA, USA. This sample cohort consisted of three groups: (1) patient plasma collected before the COVID-19 outbreak, (2) plasma collected during the pandemic from patients presenting with symptoms of SARS-CoV-2 at the Emergency Department (ED) with a negative NP RNA test, and (3) serial plasma samples collected during the pandemic from patients who had tested positive for SARS-CoV-2 infection and were hospitalized for COVID-19. Clinical characteristics of each patient group are shown in Supplementary Table 5. Samples were measured at two different dilution factors and similar results were observed. Plasma samples measured at a 4000x dilution factor show that all four viral antigens elicit an IgG, IgM, and IgA immune response in COVID-19 positive patients. All twelve combinations (i.e. each of the four viral targets against each of the three immunoglobulins) show an overall increase in immunoglobulin levels over the course of the disease. Only one patient had a decrease in immunoglobulin levels; this person did not survive their infection with SARS-CoV-2. In addition, a separate patient who displayed low immunoglobulin levels at the late time point was on immunosuppressive medication.

### A. Simoa serological assay results using 1000x dilution

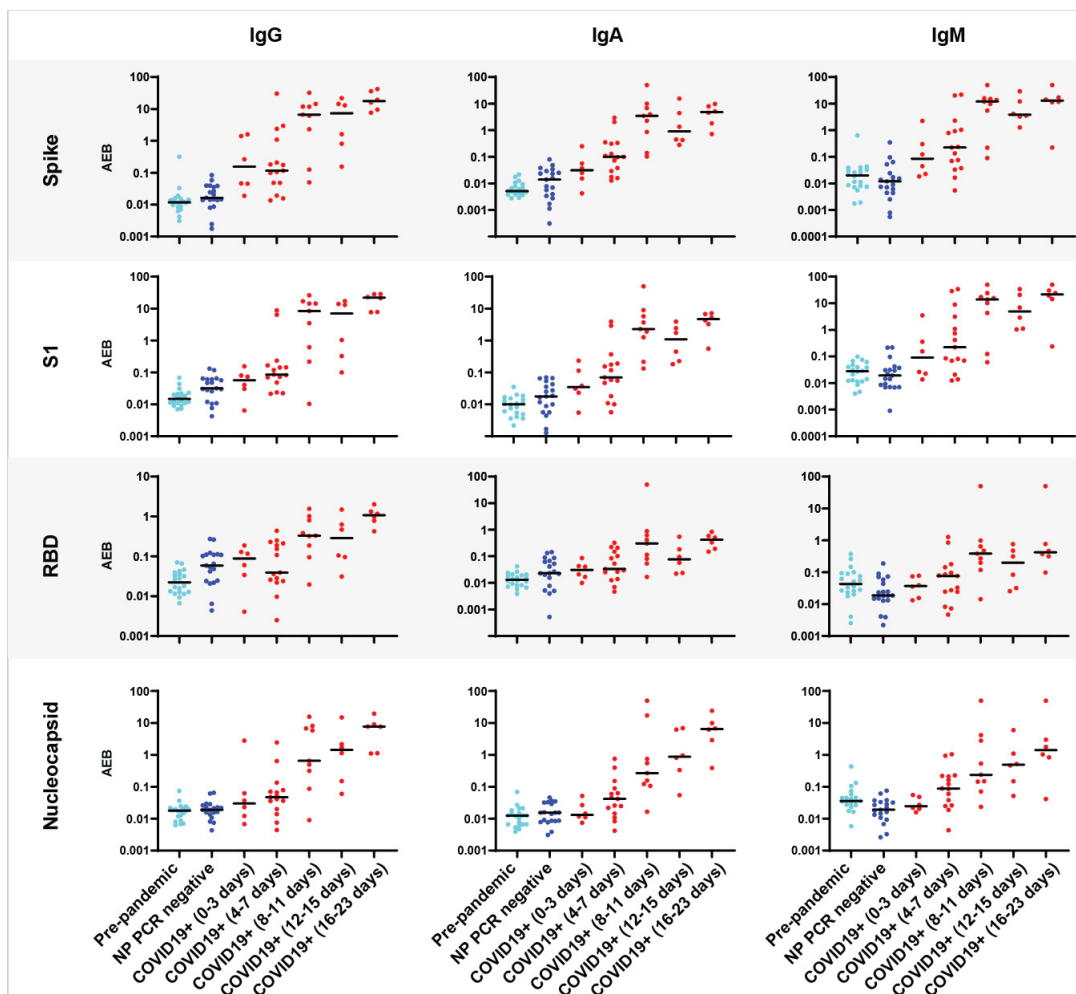



## B. Simoa serological assay results using 4000x dilution

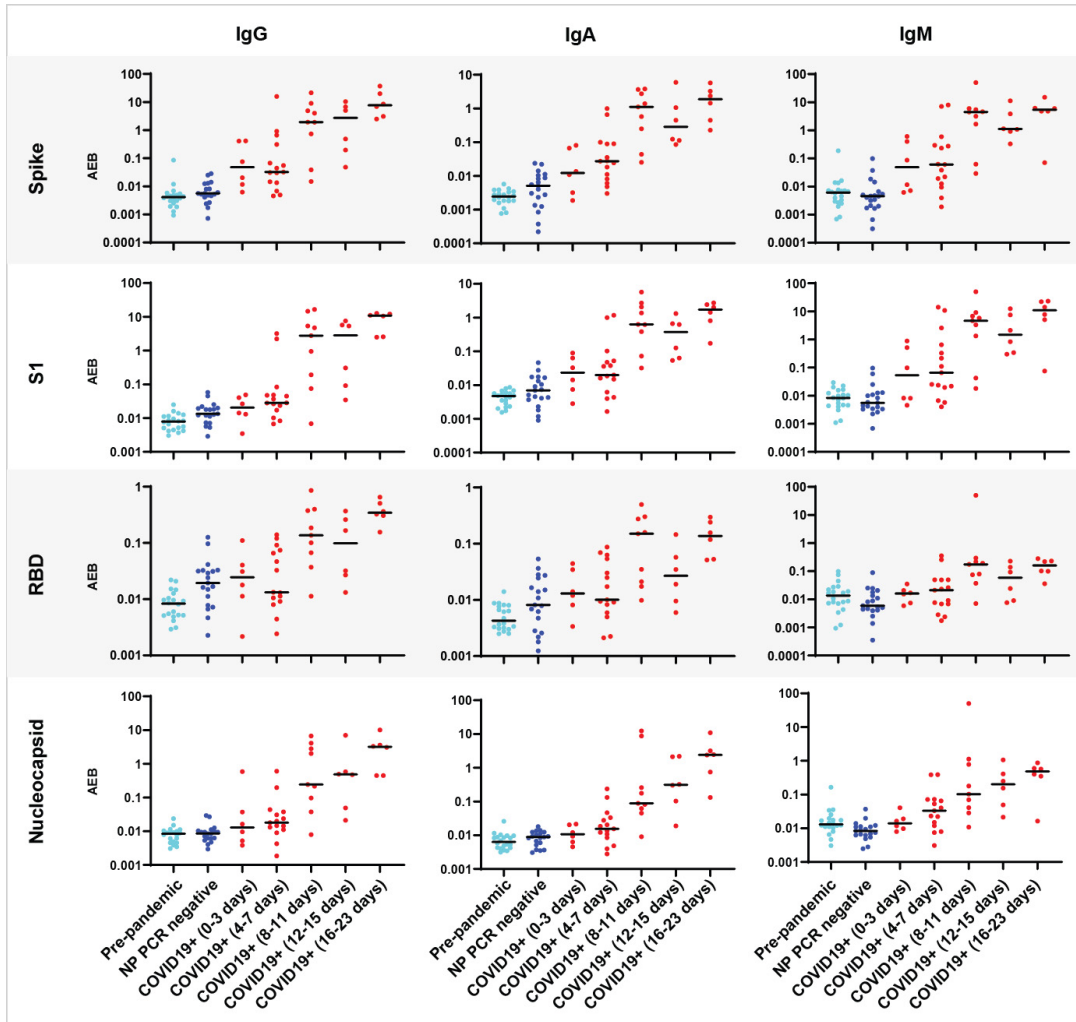

Supplementary Figure 5. Simoa serological assay results for IgG, IgM, and IgA against the four viral targets: Spike, S1 subunit, Receptor Binding Domain, and Nucleocapsid for pre-pandemic samples (light blue, n=20), NP PCR negative samples (dark blue, n=19) and COVID-19 positive samples (red, n=21, two timepoints each). The COVID-19 positive samples were divided into five groups according to time since symptom onset. Black lines indicate the mean AEB (average enzyme per bead) value of each population.

### **Supplementary Figure 6: CV values – validation cohort**

Coefficients of Variance (CV) of the duplicate measurements for each of the samples in the validation cohort. Each dot represents the CV of duplicate measurements for each of the 472 datapoints show in Figure 2. The red line indicates the median of the CVs. As can be seen, all CVs were in an acceptable range indicating the accuracy of the measurements.

CVs - Validation cohort

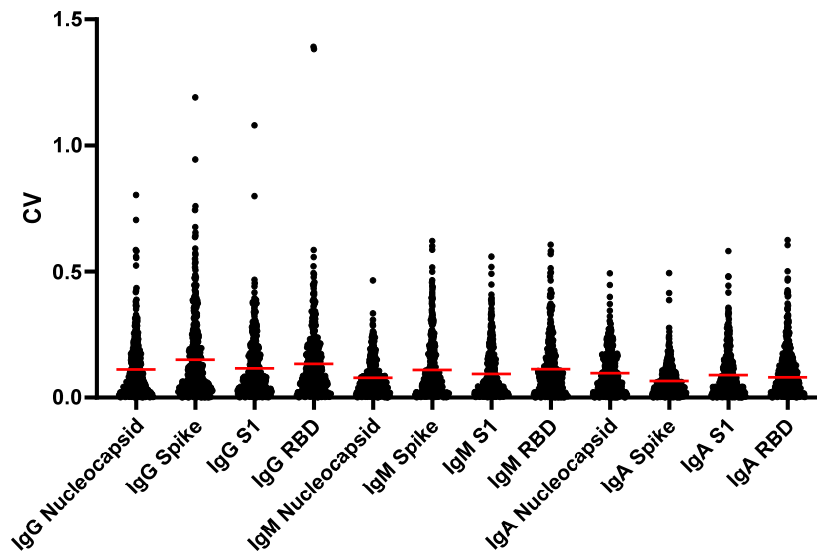

**Supplementary Table 6: U-test results – validation cohort**

Mann-Whitney U test results for each of the four subgroups (0-3 days, 4-7 days, 8-14 days, and >14 days after positive NP RT-PCR) against the pre-pandemic control. All U-tests are two-tailed but do not correct for multiple comparisons.

|           | IgG Nuc  | IgG Spike | IgG S1   | IgG RBD  | IgM Nuc  | IgM Spike | IgM S1   | IgM RBD  | IgA Nuc  | IgA Spike | IgA S1   | IgA RBD  |
|-----------|----------|-----------|----------|----------|----------|-----------|----------|----------|----------|-----------|----------|----------|
| 0-3 days  | P<0.0001 | P<0.0001  | P<0.0001 | P<0.0001 | P<0.0001 | P<0.0001  | P<0.0001 | p=0.0101 | P<0.0001 | P<0.0001  | P<0.0001 | P<0.0001 |
| 4-7 days  | P<0.0001 | P<0.0001  | P<0.0001 | P<0.0001 | P<0.0001 | P<0.0001  | P<0.0001 | P<0.0001 | P<0.0001 | P<0.0001  | P<0.0001 | P<0.0001 |
| 8-14 days | P<0.0001 | P<0.0001  | P<0.0001 | P<0.0001 | P<0.0001 | P<0.0001  | P<0.0001 | P<0.0001 | P<0.0001 | P<0.0001  | P<0.0001 | P<0.0001 |
| >15 days  | P<0.0001 | P<0.0001  | P<0.0001 | P<0.0001 | P<0.0001 | P<0.0001  | P<0.0001 | P<0.0001 | P<0.0001 | P<0.0001  | P<0.0001 | P<0.0001 |

**Supplementary Table 7: Five-fold cross validation results for early stage cases**

|              | Fold 1    |     | Fold 2    |     | Fold 3    |     | Fold 4    |     | Fold 5    |     |
|--------------|-----------|-----|-----------|-----|-----------|-----|-----------|-----|-----------|-----|
|              | Antibody  | VI  |
| Training Set | IgA S1    | 100 | IgG Spike | 100 |
|              | IgA Nuc   | 96  | IgG S1    | 89  | IgG Nuc   | 71  | IgG Spike | 97  | IgA RBD   | 95  |
|              | IgG Nuc   | 91  | IgG Nuc   | 83  | IgA Nuc   | 68  | IgG Nuc   | 77  | IgA S1    | 85  |
|              | IgG Spike | 62  | IgA Nuc   | 81  | IgG RBD   | 61  | IgA Nuc   | 56  | IgG Nuc   | 83  |
|              | IgG S1    | 45  | IgM RBD   | 0   | IgG S1    | 52  | IgA RBD   | 54  | IgA Nuc   | 72  |
|              | IgG RBD   | 3   | IgG Spike | 0   | IgA RBD   | 48  | IgG RBD   | 0   | IgG RBD   | 69  |
|              | IgM Spike | 1   | IgM S1    | 0   | IgG Spike | 33  | IgG S1    | 0   | IgM RBD   | 2   |
|              | IgM S1    | 0   | IgA RBD   | 0   | IgA Spike | 0   | IgA Spike | 0   | IgM Nuc   | 0   |
|              | IgA Spike | 0   |           |     |           |     |           |     | IgA Spike | 0   |

**AUC, All Test Sets Combined: 98% (95% CI 96%, 100%)**

Each of the 290 participants in the cross validation was randomly assigned to one of five groups that included 58 participants. In each of five folds, one group of 58 was set aside as a fold-specific test set and the other four groups were combined to create a training set of 232 participants. For each fold, the model was identified through a backwards-selection process starting with predictors of all 12 antibodies measured. Variable importance rounded to the nearest integer. Variables that dropped out entirely had importance of 0.

AUC=Area Under Receiver Operating Characteristic Curve, Nuc=Nucleocapsid, RBD=RNA Binding Domain, VI=Variable Importance

**Supplementary Table 8: Five-fold cross validation results for late stage cases**

|                     | <b>Fold 1</b>   |           | <b>Fold 2</b>   |           | <b>Fold 3</b>   |           | <b>Fold 4</b>   |           | <b>Fold 5</b>   |           |
|---------------------|-----------------|-----------|-----------------|-----------|-----------------|-----------|-----------------|-----------|-----------------|-----------|
|                     | <b>Antibody</b> | <b>VI</b> |
| <b>Training Set</b> | IgM S1          | 100       | IgA S1          | 100       |
|                     | IgA Spike       | 41        | IgA Spike       | 0         |                 |           | IgG S1          | 29        |                 |           |
|                     | IgA S1          | 29        |                 |           |                 |           | IgM S1          | 17        |                 |           |
|                     | IgG RBD         | 5         |                 |           |                 |           | IgA RBD         | 13        |                 |           |
|                     | IgM Spike       | -8        |                 |           |                 |           | IgG Nuc         | 2         |                 |           |
|                     | IgG Nuc         | -10       |                 |           |                 |           | IgG Spike       | 0         |                 |           |
|                     |                 |           |                 |           |                 |           | IgM RBD         | 0         |                 |           |

**AUC, All Test Sets Combined: 100% (95% CI 100%, 100%)**

Each of the 249 participants in the cross validation was randomly assigned to one of five groups that included 50 participants (one group had only 49 participants). In each of five folds, one group of 50 (or 49 in one fold) was set aside as a fold-specific test set and the other four groups were combined to create a training set of 199 participants (or 200 in one fold). For each fold, the model was identified through a backwards-selection process starting with predictors of all 12 antibodies measured. Variable importance rounded to the nearest integer. Variables that dropped out entirely had importance of 0.

AUC=Area Under Receiver Operating Characteristic Curve, Nuc=Nucleocapsid, RBD=RNA Binding Domain, VI=Variable Importance

**Supplementary Table 9: Classification accuracy**

| <b>Case Group</b> | <b>Model</b> | <b>Positive Cases</b> | <b>Total Cases</b> | <b>Sensitivity (%)</b> | <b>Negative Controls</b> | <b>Total Controls</b> | <b>Specificity (%)</b> | <b>Overall Accuracy (%)</b> |
|-------------------|--------------|-----------------------|--------------------|------------------------|--------------------------|-----------------------|------------------------|-----------------------------|
| All               | Early-Stage  | 124                   | 141                | 88                     | 195                      | 199                   | 98                     | 94                          |
| All               | Late-Stage   | 122                   | 141                | 87                     | 192                      | 199                   | 96                     | 92                          |
| All               | Full         | 127                   | 141                | 90                     | 194                      | 199                   | 97                     | 94                          |
| Early-Stage       | Early-Stage  | 74                    | 91                 | 81                     | 195                      | 199                   | 98                     | 93                          |
| Early-Stage       | Full         | 77                    | 91                 | 85                     | 194                      | 199                   | 97                     | 93                          |
| Late-Stage        | Late-Stage   | 50                    | 50                 | 100                    | 199                      | 199                   | 100                    | 100                         |
| Late-Stage        | Full         | 50                    | 50                 | 100                    | 199                      | 199                   | 100                    | 100                         |

Reference group was always All Controls. Predicted case status was case if model-specific predicted probability was at least 50%, otherwise predicted to be a control if predicted probability was less than 50%.

### **Supplementary Figure 7: Cross reactivity of the control samples with common human coronaviruses**

In order to assess reactivity of pre-pandemic samples with other coronaviruses, which cause the common cold, we developed assays for Nucleocapsid and S1/RBD of the four common human coronaviruses: 229e (alpha coronavirus), NL63 (alpha coronavirus), OC43 (beta coronavirus), HKU1 (beta coronavirus). All antigens were purchased commercially from Sino Biological with the exception of the OC43 RBD, which was produced by the Aaron Schmidt Lab: 229E Nucleocapsid (40640-V07E), NL63 Nucleocapsid (40641-V07E), OC43 Nucleocapsid (40643-V07E), HKU1 Nucleocapsid (40642-V07E), 229E S1 (40601-V08H), NL63 S1 (40600-V08H), HKU1 S1 (40602-V08H). We hypothesized that many of the individuals in our pre-pandemic cohort had likely experienced an infection with one or more of these coronaviruses, and we could therefore assess how antibodies to these assays correlated with activity in our SARS-CoV-2 serological assay. To accomplish this, we coupled two sets of multiplex beads, one for the N and one for the S1/RBD antigen. Each of the four multiplex beads (488, 647, 700 and 750) was coupled to the antigen from one of four common human coronaviruses: 229e, NL63, OC43 and HKU1. Using the same assay format as was used for the SARS-CoV-2 serological assay, we tested these two multiplexed assays using detection antibodies to IgG, IgM and IgA yielding 24 values per sample. We tested the 200 pre-pandemic samples for reactivity with these other coronaviruses. Several pre-pandemic control samples had high levels of antibodies for these common coronaviruses, likely indicating prior infection with these species.

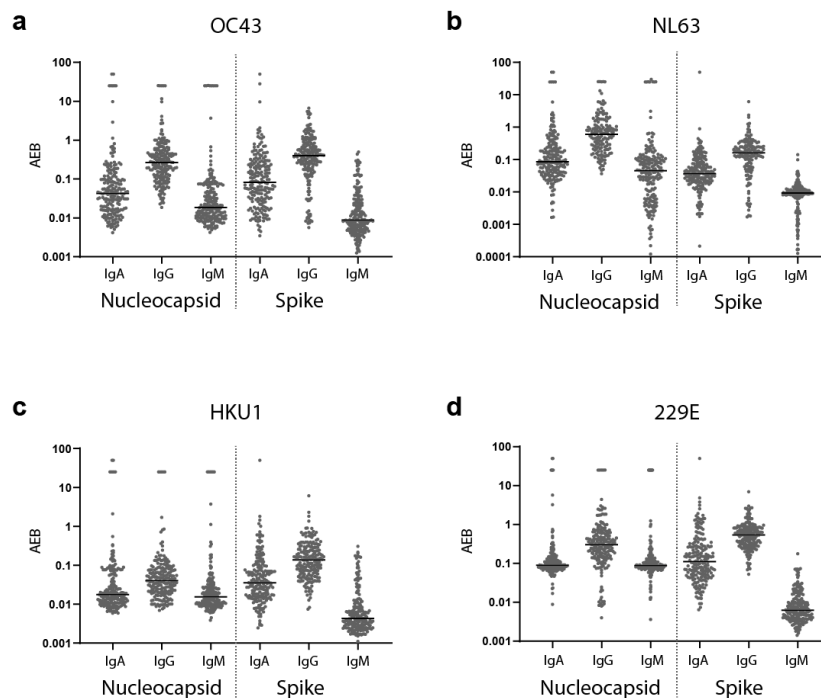

### **Codes caption:**

#### 1. Cross validation and models training.

This SAS code is for the analyses of all cases and all controls in the training set. Predicted probabilities were estimates of case status (case vs. control) as predicted by different sets of circulating antibody measurements. Two cross validations were run to identify and validate important markers: 1) among early-stage cases vs. all controls and 2) among late-stage cases vs. all controls. The predicted probabilities were used to estimate areas under receiver operating characteristic curves, calibration plots, and classification accuracies (sensitivity and specificity). For comparisons of early-stage cases vs. all controls, the code also identifies the maximum sensitivity at which a specificity of 100% is maintained for both the full 12-marker model and the 4-marker early-stage model.

#### 2. Classification of the blinded validation set according to the three models

This R code trains the three models (early stage model, late stage model and full marker panel model) with all cases and controls in the training set, and uses those models to classify the blinded validation cohort. The output includes all the ROC curves, which are used to determine the classification threshold, and the probabilities for all the unknown cases, which are then used for the classification according to a chosen threshold.
